# Supplementary material for: Deficiency of IQCH causes male infertility in humans and mice
Source: bioRxiv preprint, doi:10.1101/2023.06.23.546221, version 5 (2024-06-13)
Supplement: Figure 1-source data 1 [file 546221_file22.docx]

**Figure 1—source data 1.**Primers for Sanger sequencing and Minigene.

| **Variant** | **Sequence** |
| --- | --- |
| Sanger sequencing primer of *IQCH* | F 5' GACATGGCAGATGCAGAATCTG 3' |
| R 5' TGAATTTAGAGCAAGTTCATCAGAGA 3' |
| Amplification primer of *IQCH* for minigene assay | F 5' TACGGGATCACCAGTCCGCCTTCCGGGTTCATGCCACTCTC 3' |
| R 5' TCACCAGATATCTGGCAAGAGCCTATGGCCCACACCCTAGGC 3' |
| Amplification primer of plasmid for minigene assay | F 5' TCTGAGTCACCTGGACAACC 3' |
| R 5' ATCTCAGTGGTATTTGTGAGC 3' |
